# Supplementary material
Source: bioRxiv or medRxiv preprint supplement (https://medrxiv.org/content/medrxiv/early/2022/03/13/2022.03.11.22271527/DC1/embed/media-1.pdf)
Supplement: Supplementary file [file media-1.pdf]

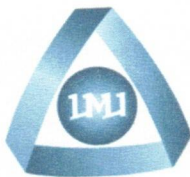

Ethics Committee  
IMI-BAS

From:  
Assoc. Prof. Ivan Chipchakov, IMI-BAS  
(names of committee members)

Prof. Virginia Kiryakova, IMI-BAS  
(names of committee members)

Prof. Evgenija Popova, IMI-BAS  
(names of committee members)

To:  
Dr. Antoni Rangachev, IMI-BAS  
Principal Investigator

The Ethics Committee at IMI-BAS has reviewed the project "The geographic and demographic impact of the COVID-19 pandemic in Bulgaria" headed by Dr. Antoni Rangachev from IMI-BAS. The research team includes Dr. Georgi Marinov from Stanford University, Mladen Mladenov from Premiere Research, and Dr. Ivailo Alexiev from the National Center for Infectious and Parasitic Diseases, Sofia. The project uses a patient-sensitive dataset for all infections and hospitalizations since the beginning of the pandemic obtained from Bulgaria's Ministry of Health. The committee has reviewed the agreement between the Ministry of Health and the research team as well as the proposed storage, processing and disposal of patient sensitive data and has found the measures compliant with ethical standards and procedures..

This letter signifies that the above research has been approved by the Ethics Committee of IMI-BAS. The approval is valid for one year from 01/03/2022 to 02/28/2023. Thereafter, continued approval is contingent upon the submission of a review request that must be submitted to the Ethics Committee prior to the expiration date of the study.

Sincerely, *I. Chipchakov*

Ivan Chipchakov, PhD  
Associate Professor at IMI-BAS,  
Chair of the Ethics Committee
